# Supplementary material for: Adjustable comb/bottlebrush fast UV-curable epoxy-based form-stable phase change materials with high encapsulation rates and ultralow enthalpy loss
Source: Royal Society of Chemistry journal article supplement (doi:10.1039/d3py00851g), 2023-12-18
Supplement: d3py00851g1.pdf [file d3py00851g1.pdf]

## Supporting Information for

### Adjustable comb/bottlebrush fast UV-curable epoxy-based form-stable phase change materials with high encapsulation rate and ultralow enthalpy loss

Yu Fan<sup>a</sup>, Yanyun Li<sup>a</sup>, Xinyuan Tang<sup>a</sup>, Junying Zhang<sup>a</sup>, Jue Cheng<sup>a\*</sup>, Qingsong Lian<sup>b\*</sup>

<sup>a</sup>Key Laboratory of Carbon Fiber and Functional Polymers, Ministry of Education, Beijing University of Chemical Technology, Beijing 100029, China

<sup>b</sup>College of Materials Science and Engineering, North University of China, Taiyuan 030051, China

\* Corresponding author and E-mail address:

[chengjue@mail.buct.edu.cn](mailto:chengjue@mail.buct.edu.cn) (Jue Cheng),

[lianqs@nuc.edu.cn](mailto:lianqs@nuc.edu.cn) (Qingsong Lian),

Tel. /fax: +86 10 64425439

## Table of Contents

### Abbreviation list

#### 1. The main chemical structures in this study

#### 2. Characterization of xD18

2.1 The chemical equation of xD18

2.2 <sup>1</sup>H-NMR spectra

2.3 FTIR spectra of the xD18

2.4 DSC analysis of the xD18

#### 3. Characterization of the un-50DA18-y and 50DA18-y samples

3.1 FTIR spectra

3.2 DSC analysis

#### 4. Characterization of the 50H-50DA18<sub>Pa-m-y</sub>

4.1 leakage test

4.2 DSC analysis

## 5. Characterization of the 30H-xDA18 and 30H-xDA18<sub>Pa-m</sub>

5.1 DSC analysis

5.2 leakage test

## 6. Photothermal conversion of the FSPCMs

## 7. NMR of the 50DF18 sample

## 8. Thermal characteristics of the other samples

### Abbreviations list

---

|                      |                                   |                                |                              |
|----------------------|-----------------------------------|--------------------------------|------------------------------|
| <b>PCMs</b>          | phase change materials            | <b>TES</b>                     | thermal energy storage       |
| <b>FSPCMs</b>        | Form-stable PCMs                  | <b>SLPCMs</b>                  | solid-liquid PCMs            |
| <b>PEG</b>           | polyethylene glycol               | <b>PU</b>                      | polyurethane                 |
| <b>PE</b>            | polyethylene                      | <b>EP</b>                      | epoxy resin                  |
| <b>ODT</b>           | 1-Octadecanethiol                 | <b>CNT</b>                     | carbon nanotubes             |
| <b>HDT</b>           | 1,6-Hexanedithiol                 | <b>ODA</b>                     | octadecylamine               |
| <b>FM</b>            | furfuryl mercaptan                | <b>BMI</b>                     | bismaleimide                 |
| <b>FT-IR</b>         | Fourier transform infrared        | <b>TGA</b>                     | thermogravimetric analysis   |
| <b>XRD</b>           | X-ray diffraction                 | <b>POM</b>                     | optical microscopy           |
| <b>DSC</b>           | differential scanning calorimetry | <b>SEM</b>                     | scanning electron microscope |
| <b>DMA</b>           | dynamic mechanical analyses       | <b>UV</b>                      | ultra-violet                 |
| <b>T<sub>m</sub></b> | melting temperature               | <b><math>\Delta H_f</math></b> | latent heat during freezing  |

---

|                      |                              |                       |                            |
|----------------------|------------------------------|-----------------------|----------------------------|
| <b>T<sub>g</sub></b> | glass transition temperature | <b>ΔH<sub>m</sub></b> | latent heat during melting |
| <b>D-A</b>           | Diels-Alder                  | <b>ΔG</b>             | free energy of mixing      |

## 1. The main chemical structures in this study

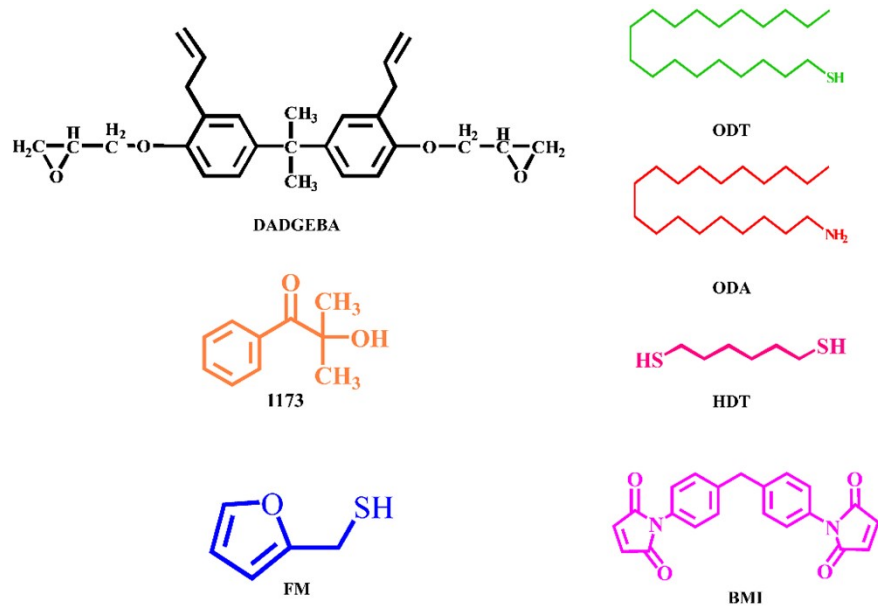

**Scheme. S1** The structures of DADGEBA, ODT, ODA, 1173, HDT, FM, and BMI

## 2. Characterization of xD18

### 2.1 The chemical equation of xD18

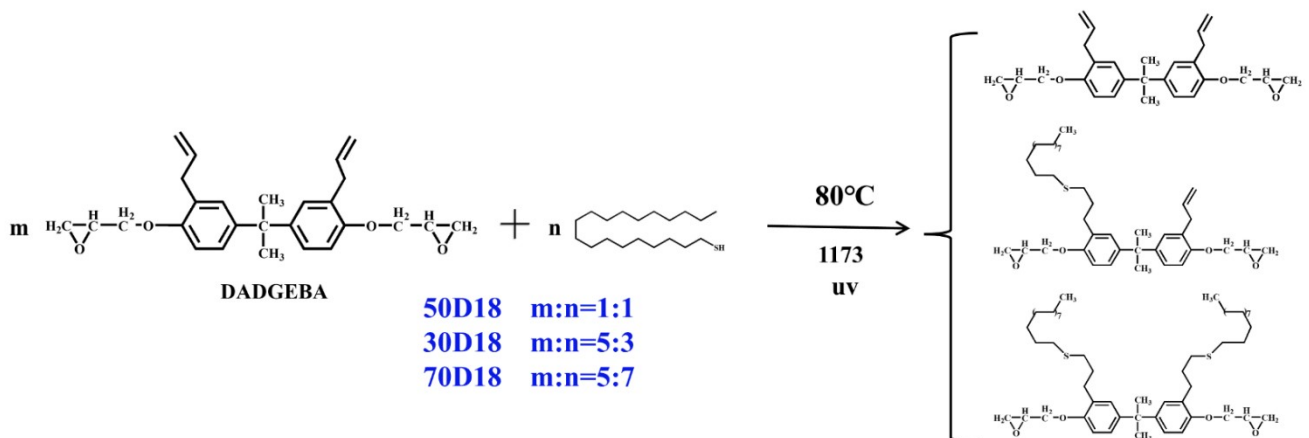

## Scheme S2 Thiol-ene click chemistry of DADGEBa and ODT

### 2.2 $^1\text{H-NMR}$ spectra

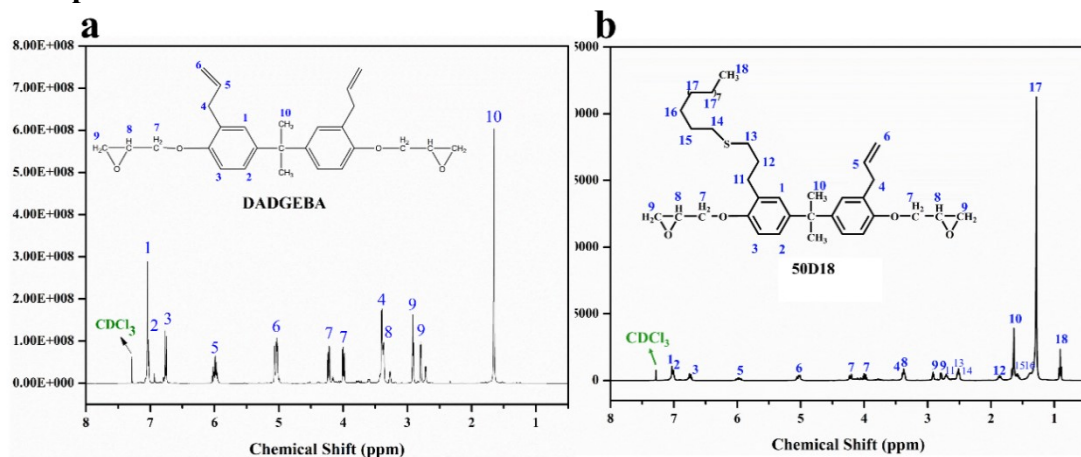

Fig. S1  $^1\text{H-NMR}$  spectra of (a) DADGEBa; and (b) 50D18 samples

$^1\text{H-NMR}$  spectra shown in Fig. S1 further proved the consumption of double bonds, because the chemical shifts of the unsaturated H atoms corresponding to allyl groups in DADGEBa (at 3.37, 5.95, and 5.00 ppm) disappeared and moves to 2.69, 2.49, and 1.84 ppm (attributed to D18).

### 2.3 FTIR spectra of the xD18

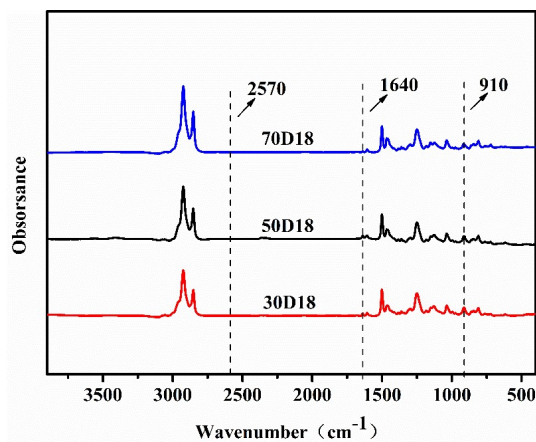

Fig. S2 FTIR spectrum of xD18 samples

### 2.4 DSC analysis of the xD18

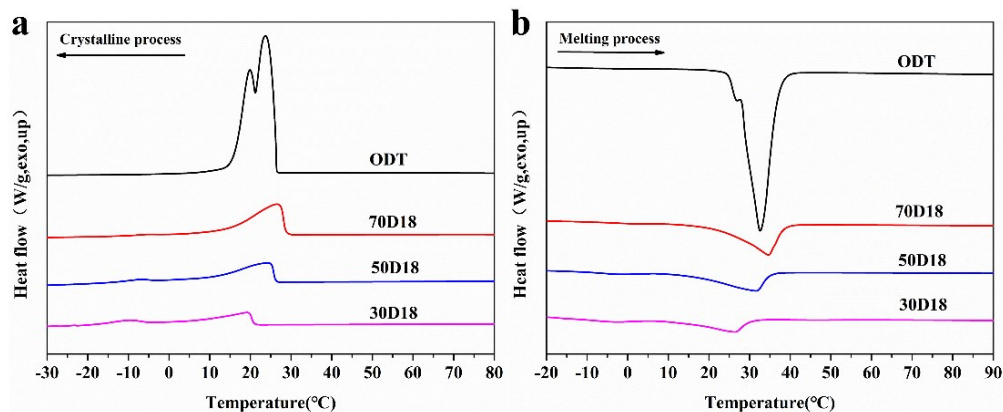

Fig. S3 DSC curves of xD18 and ODT samples

### 3. Characterization of the un-50DA18-y and 50DA18-y

#### 3.1 FTIR spectra

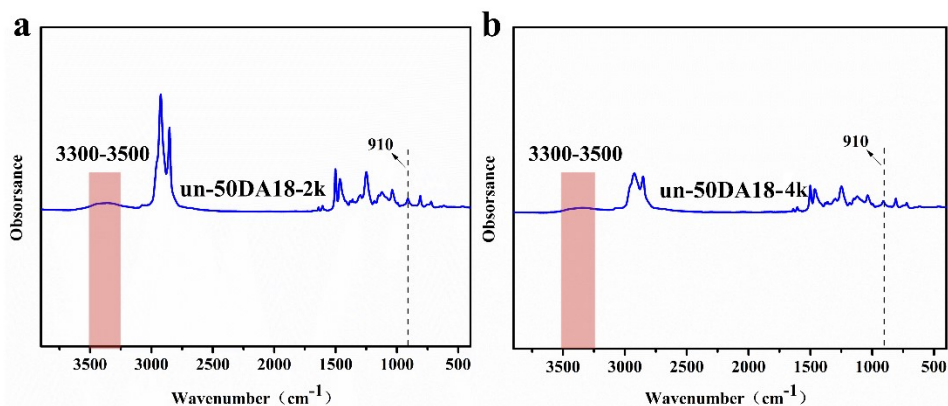

Fig. S4 FTIR spectrum of (a) un-50DA18-2k sample; and (b) un-50DA18-4k sample

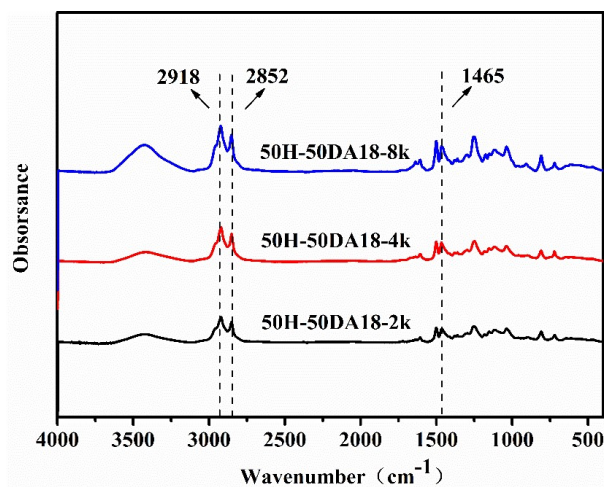

Fig. S5 FTIR spectra of the 50H-50DA18-2k, 50H-50DA18-4k, and 50H-50DA18-8k samples

### 3.2 DSC analysis

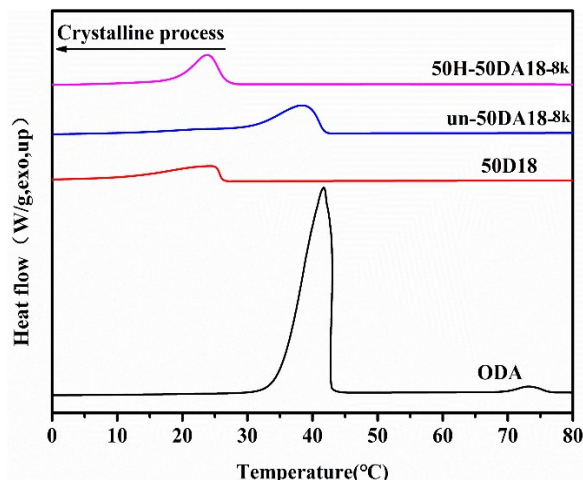

**Fig. S6** Crystalline process of ODA, 50D18, un-50DA18-8k systems, and 50H-50DA18-8k systems.

**Table S1** Thermal characteristics of un-xDA18 and 30H-xDA18

| Sample     | $T_m$ (°C) | $\Delta H_m$ (Jg <sup>-1</sup> ) | $\Delta H_m^T$ (Jg <sup>-1</sup> ) | $\Delta H_{m,loss}$ | $T_f$ (°C) | $\Delta H_f$ (Jg <sup>-1</sup> ) | $\Delta H_f^T$ (Jg <sup>-1</sup> ) | $\Delta H_{f,loss}$ |
|------------|------------|----------------------------------|------------------------------------|---------------------|------------|----------------------------------|------------------------------------|---------------------|
| un-30DA18  | 40.5       | 54.7                             | 121.1                              | 54.8%               | 26.1       | 48.2                             | 120.8                              | 60.0%               |
| un-50DA18  | 46.5       | 74.6                             | 131.9                              | 43.4%               | 33.8       | 61.6                             | 129.7                              | 52.5%               |
| un-70DA18  | 51.1       | 86.5                             | 140.4                              | 38.4%               | 39.5       | 72.9                             | 140.0                              | 47.9%               |
| 30H-30DA18 | 34.5       | 35.4                             | 51.9                               | 31.8%               | 16.3       | 34.9                             | 45.7                               | 23.6%               |
| 30H-50DA18 | 42.4       | 45.9                             | 71.1                               | 35.4%               | 21.6       | 41.4                             | 58.7                               | 29.5%               |
| 30H-70DA18 | 44.3       | 52.5                             | 82.6                               | 36.4%               | 28.1       | 48.0                             | 69.6                               | 31.0%               |

Notes:  $T_m$ ,  $T_f$ ,  $\Delta H_m$ , and  $\Delta H_f$  can be obtained directly from DSC curves;  $\Delta H_m^T$  and  $\Delta H_f^T$  of the un-xDA18 samples were calculated by summing the melting or freezing enthalpies of the xDA18, ODT, and ODA parts (respectively multiplying the weight percentage of xDA18, ODT, and ODA with the melting or freezing enthalpies of the xDA18, ODT, and ODA);  $\Delta H_m^T$  and  $\Delta H_f^T$  of the 30H-xDA18 samples were calculated by multiplying the weight percentage of un-xDA18 with the melting or freezing enthalpies of the un-xDA18 samples;  $\Delta H_m$  loss (%) of the 30H-xDA18 samples was the percentage of the difference between  $\Delta H_m$  ( $\Delta H_f$ ) and  $\Delta H_m^T$  ( $\Delta H_f^T$ )

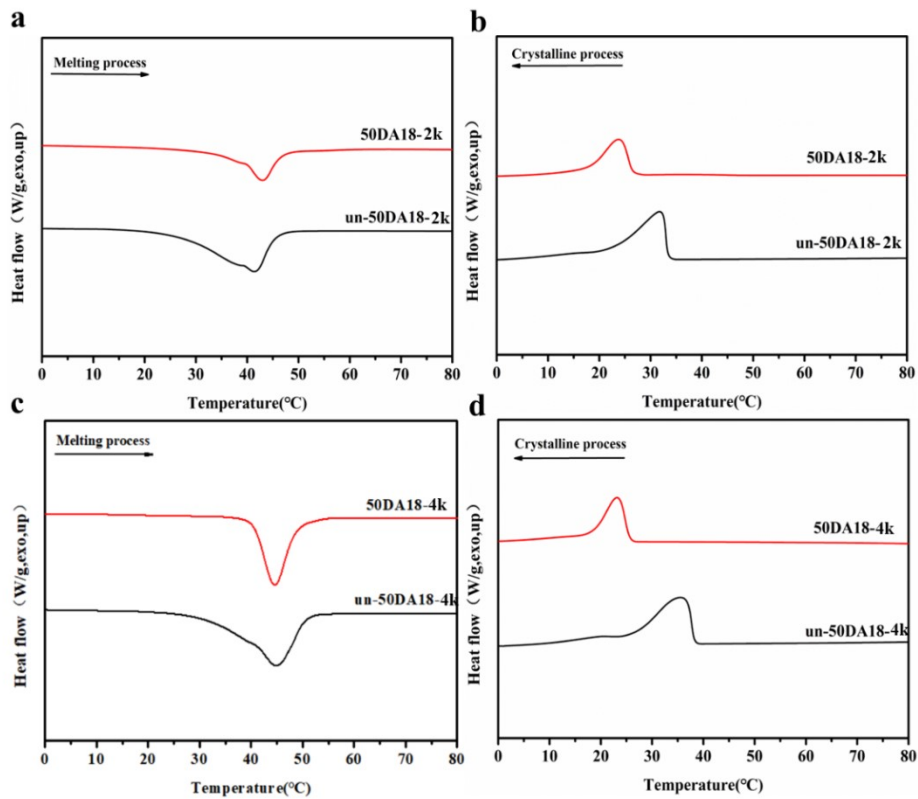

Fig. S7 DSC curves of (a) and (b) un-50DA18-2k and 50H-50DA18-2k samples; (c) and (d) un-50DA18-4k and 50H-50DA18-4k samples.

#### 4. Characterization of the 50H-50DA18<sub>pa-m-y</sub>

##### 4.1 Leakage test

**Table S2** Mass change of all samples after phase change

| Sample                          | Original<br>(gram) | After heating<br>(gram) | Leakage<br>problem |
|---------------------------------|--------------------|-------------------------|--------------------|
| 50H-50DA18-2k                   | 1.613              | 1.613                   | No                 |
| 50H-50DA18 <sub>Pa-30</sub> -2k | 1.423              | 1.423                   | No                 |
| 50H-50DA18 <sub>Pa-40</sub> -2k | 1.466              | 1.466                   | No                 |
| 50H-50DA18 <sub>Pa-50</sub> -2k | 1.334              | 1.334                   | No                 |
| 50H-50DA18 <sub>Pa-60</sub> -2k | 1.551              | 1.427                   | 8%                 |
| 50H-50DA18 <sub>Pa-70</sub> -2k | 1.554              | 1.290                   | 17%                |
| 50H-50DA18-4k                   | 1.731              | 1.731                   | No                 |
| 50H-50DA18 <sub>Pa-30</sub> -4k | 1.501              | 1.500                   | No                 |
| 50H-50DA18 <sub>Pa-40</sub> -4k | 1.332              | 1.332                   | No                 |
| 50H-50DA18 <sub>Pa-50</sub> -4k | 1.621              | 1.621                   | No                 |
| 50H-50DA18 <sub>Pa-60</sub> -4k | 1.550              | 1.504                   | 3%                 |
| 50H-50DA18 <sub>Pa-70</sub> -4k | 1.713              | 1.559                   | 9%                 |
| 50H-50DA18-8k                   | 1.433              | 1.433                   | No                 |
| 50H-50DA18 <sub>Pa-30</sub> -8k | 1.612              | 1.612                   | No                 |
| 50H-50DA18 <sub>Pa-40</sub> -8k | 1.555              | 1.555                   | No                 |
| 50H-50DA18 <sub>Pa-50</sub> -8k | 1.675              | 1.675                   | No                 |
| 50H-50DA18 <sub>Pa-60</sub> -8k | 1.435              | 1.435                   | No                 |
| 50H-50DA18 <sub>Pa-70</sub> -8k | 1.774              | 1.703                   | 4%                 |

## 4.2 DSC analysis

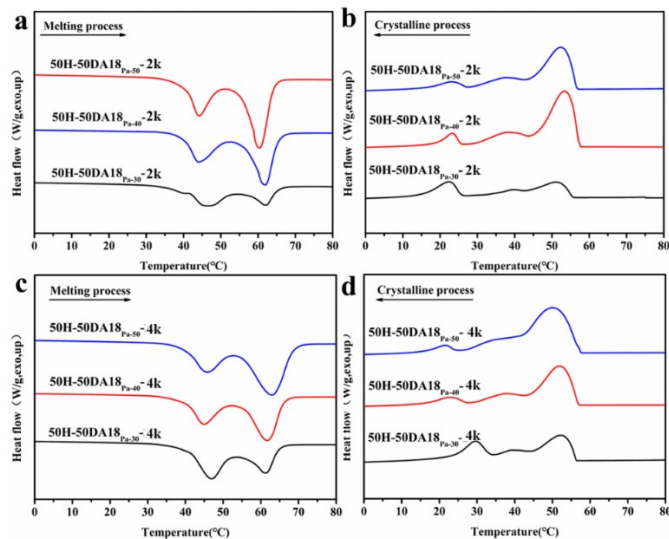**Fig. S8** DSC curve of 50H-50DA18A<sub>Pa-m</sub>-2k and 50H-50DA18A<sub>Pa-m</sub>-4k samples.



## 5. Characterization of the 30H-xDA18 and 30H-xDA18<sub>Pa-m</sub>

### 5.1 DSC analysis

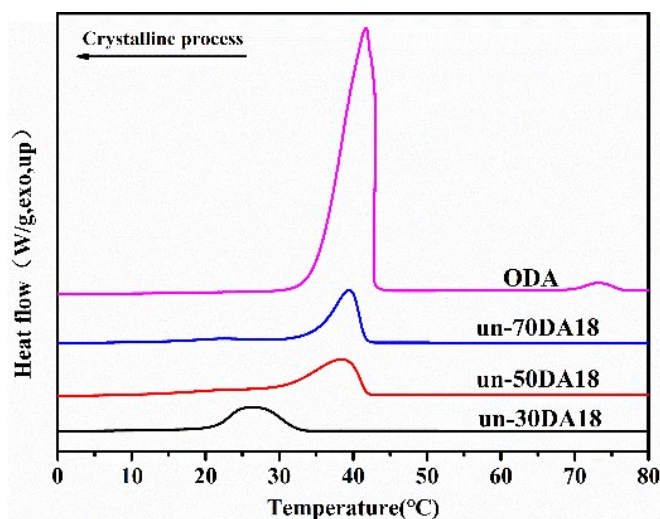

Fig. S9 The freezing process of DSC curves for ODA and un-xDA18 samples

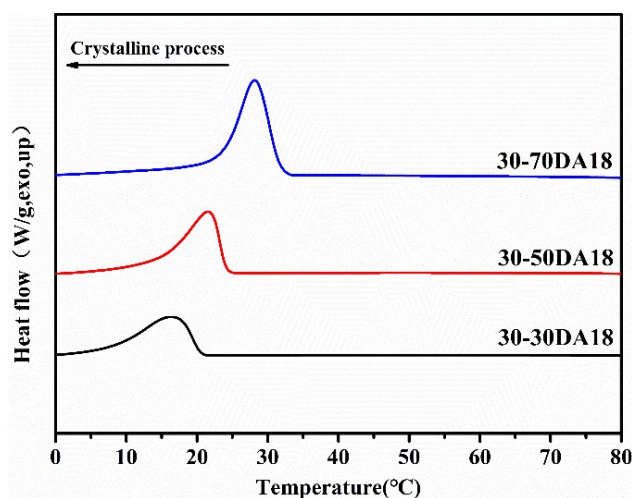

Fig. S10 The freezing process of DSC curves for 30H-xDA18 samples

Table S3 Thermal characteristics of 30H-xDA18<sub>Pa-m</sub> systems

| Sample                      | $\Delta H_m$ (Jg <sup>-1</sup> ) | $\Delta H_m^T$ (Jg <sup>-1</sup> ) | $\Delta H_m$ loss | $\Delta H_f$ (Jg <sup>-1</sup> ) | $\Delta H_f^T$ (Jg <sup>-1</sup> ) | $\Delta H_f$ loss |
|-----------------------------|----------------------------------|------------------------------------|-------------------|----------------------------------|------------------------------------|-------------------|
| 30H-30DA18 <sub>Pa-30</sub> | 88.0                             | 91.9                               | 4.2%              | 86.7                             | 91.0                               | 4.7%              |
| 30H-50DA18 <sub>Pa-30</sub> | 93.7                             | 98.1                               | 4.5%              | 89.5                             | 94.9                               | 5.7%              |
| 30H-70DA18 <sub>Pa-30</sub> | 98.9                             | 103.9                              | 4.8%              | 93.5                             | 100.2                              | 6.7%              |
| 30H-30DA18 <sub>Pa-40</sub> | 109.1                            | 110.7                              | 1.4%              | 107.9                            | 109.7                              | 1.6%              |
| 30H-50DA18 <sub>Pa-40</sub> | 113.9                            | 116.1                              | 1.9%              | 110.5                            | 113                                | 2.2%              |

Notes:  $\Delta H_m^T$  and  $\Delta H_f^T$  of the 30H-xDA18<sub>Pa-m</sub> systems were calculated by summing the melting or freezing enthalpies of the 30H-xDA18<sub>Pa-0</sub> parts (multiplying the weight percentage of 30H-xDA18<sub>Pa-0</sub> with the melting or freezing enthalpies of the 30H-xDA18<sub>Pa-0</sub> samples) and the paraffin parts (multiplying the weight percentage of paraffin with the melting or freezing

enthalpies of paraffin).;  $\Delta H_m$  loss (%) of the 30H-xDA18<sub>Pa-m</sub> samples was the percentage of the difference between  $\Delta H_m$  ( $\Delta H_f$ ) and  $\Delta H_m^T$  ( $\Delta H_f^T$ ).

## 5.2 Leakage test

**Table S4** Mass change of all samples after phase change

| Sample                      | Original<br>(gram) | After heating<br>(gram) | Leakage problem |
|-----------------------------|--------------------|-------------------------|-----------------|
| 30H-30DA18                  | 1.309              | 1.309                   | No              |
| 30H-30DA18 <sub>Pa-30</sub> | 1.412              | 1.412                   | No              |
| 30H-30DA18 <sub>Pa-40</sub> | 1.443              | 1.443.6                 | No              |
| 30H-30DA18 <sub>Pa-50</sub> | 1.533              | 1.456                   | 5%              |
| 30H-50DA18                  | 1.512              | 1.512                   | No              |
| 30H-50DA18 <sub>Pa-30</sub> | 1.551              | 1.551                   | No              |
| 30H-50DA18 <sub>Pa-40</sub> | 1.594              | 1.594                   | No              |
| 30H-30DA18 <sub>Pa-50</sub> | 1.796              | 1.509                   | 16%             |
| 30H-70DA18                  | 1.631              | 1.631                   | No              |
| 30H-70DA18 <sub>Pa-30</sub> | 1.501              | 1.501                   | No              |
| 30H-70DA18 <sub>Pa-30</sub> | 1.650              | 1.551                   | 6%              |

## 6. Photothermal conversion of the FSPCMs

The solar-thermal energy storage efficiency ( $\eta$ ) of the PCMs under the light irradiation was estimated by the ratio between the stored thermal energy and the received light energy using the following equation:<sup>1</sup>

$$\eta = \frac{Q_s}{Q} = \frac{m \times \Delta H}{P \times A \times t}$$

where  $Q_s$  is the stored thermal energy by the PCMs,  $Q$  is the received light energy by the sample,  $m$  (~2.6 g) is the mass of the nanocomposite sample,  $P$  (1500 W m<sup>-2</sup>) is the intensity of the simulated solar light,  $A$  (6.76 cm<sup>2</sup>) is the surface area of the nanocomposite exposed to light,  $t$  (500s) is the duration of light irradiation for heating the composite from a lower temperature ( $T_1$ ) to a higher temperature ( $T_2$ ), and  $\Delta H$  is the enthalpy change of the composite between the temperature range ( $T_1$  to  $T_2$ ) and can be obtained by the DSC measurements. When the temperature of the PCMs increased from 30 °C to 70 °C, which corresponded to an enthalpy change ( $\Delta H$ ) of 136.6 J g<sup>-1</sup>, a storage efficiency ( $\eta$ ) is calculated to be 70% for this period.

## 7. Characterization of the 50DF18 sample

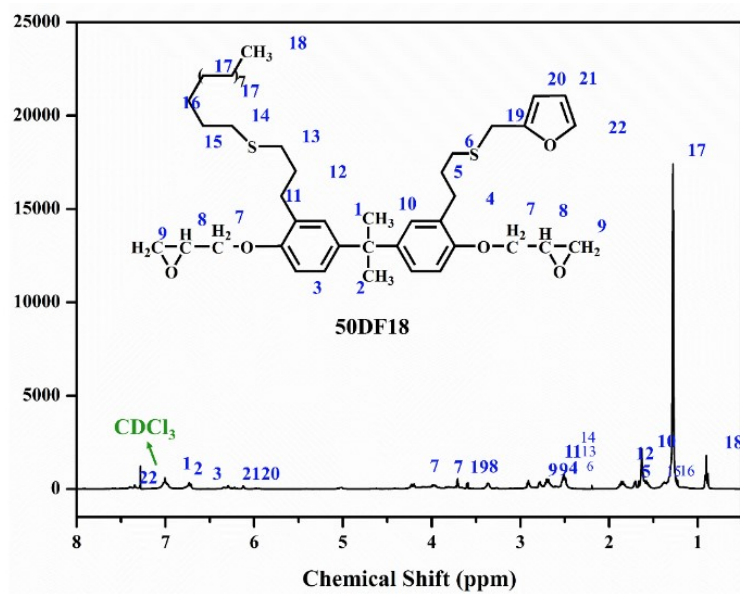

Fig. S11 NMR of the 50DFA18 sample

**Table S5** Thermal characteristics of the 50DF18, un-50DFA18 and 50DFA18 samples

| Sample     | $T_m$<br>(°C) | $\Delta H_m$<br>(Jg <sup>-1</sup> ) | $\Delta H_m^T$<br>(Jg <sup>-1</sup> ) | $\Delta H_{m\text{loss}}$<br>(%) | $T_f$<br>(°C) | $\Delta H_f$<br>(Jg <sup>-1</sup> ) | $\Delta H_f^T$<br>(Jg <sup>-1</sup> ) | $\Delta H_{m\text{loss}}$<br>(%) |
|------------|---------------|-------------------------------------|---------------------------------------|----------------------------------|---------------|-------------------------------------|---------------------------------------|----------------------------------|
| 50DF18     | 32.5          | 53.7                                | 59.8                                  | 10.2                             | 26.3          | 53.5                                | 57.4                                  | 7.0                              |
| un-50DFA18 | 46.0          | 70.4                                | 88.6                                  | 20.5                             | 36.4          | 56.9                                | 88.4                                  | 35.6                             |
| 50DFA18    | 34.4          | 20.4                                | 59.5                                  | 65.7                             | 14.1          | 19.8                                | 48.1                                  | 58.8                             |

Notes:  $T_m$ ,  $T_f$ ,  $\Delta H_m$ , and  $\Delta H_f$  can be obtained directly from DSC curves;  $\Delta H_m^T$  and  $\Delta H_f^T$  of the 50DF18 sample was calculated by multiplying the weight percentage of 50DF18 with the melting or freezing enthalpies of the 50DF18 samples.  $\Delta H_m^T$  and  $\Delta H_f^T$  of the un-50DFA18 sample was calculated by summing the melting or freezing enthalpies of the 50DF18 and ODA parts (respectively multiplying the weight percentage of 50DF18 and ODA with the melting or freezing enthalpies of the 50DF18 and ODA);  $\Delta H_m^T$  and  $\Delta H_f^T$  of the 50DFA18 sample was calculated by multiplying the weight percentage of un-50DFA18 with the melting or freezing enthalpies of the un-50DFA18 samples.  $\Delta H_m$  loss (%) of the 50DF18, un-50DFA18 and 50DFA18 samples was the percentage of the difference between  $\Delta H_m$  ( $\Delta H_f$ ) and  $\Delta H_m^T$  ( $\Delta H_f^T$ ).

## 8. Thermal characteristics of the other samples

**Table S6** Thermal characteristics of the other samples

| system | $T_m$ (°C) | $\Delta H_m$ (Jg <sup>-1</sup> ) | $\Delta H_m^T$<br>(Jg <sup>-1</sup> ) | $\Delta H_m$<br>loss (%) | $T_f$ (°C) | $\Delta H_f$ (Jg <sup>-1</sup> ) | $\Delta H_f^T$<br>(Jg <sup>-1</sup> ) | $\Delta H_m$<br>loss (%) |
|--------|------------|----------------------------------|---------------------------------------|--------------------------|------------|----------------------------------|---------------------------------------|--------------------------|
| ODT    | 32.7       | 236.9                            | /                                     | /                        | 23.3       | 228.8                            | /                                     | /                        |
| ODA    | 54.14      | 306.6                            | /                                     | /                        | 41.75      | 306.2                            | /                                     | /                        |
| Paffin | 60.93      | 223.7                            | /                                     | /                        | 55.26      | 221.9                            | /                                     | /                        |
| 30D18  | 26.2       | 46.9                             | 69.1                                  | 32.1                     | 19.1       | 46.7                             | 66.8                                  | 30.1                     |
| 50D18  | 31.5       | 69.2                             | 96.5                                  | 28.3                     | 22.8       | 66.4                             | 93.2                                  | 28.8                     |
| 70D18  | 34.6       | 83.8                             | 116                                   | 27.9                     | 26.5       | 83.2                             | 112.1                                 | 25.8                     |

Notes:  $T_m$ ,  $T_f$ ,  $\Delta H_m$ , and  $\Delta H_f$  can be obtained directly from DSC curves;  $\Delta H_m^T$  and  $\Delta H_f^T$  of the xD18 samples were calculated by multiplying the weight percentage of ODT with the melting or freezing enthalpies of the ODT samples.  $\Delta H_m$  loss (%) of the xD18 samples was the percentage of the difference between  $\Delta H_m$  ( $\Delta H_f$ ) and  $\Delta H_m^T$  ( $\Delta H_f^T$ ).

## Reference

- 1 L. Zhang, R. Li, B. Tang and P. Wang, *Nanoscale*, 2016, **8**, 14600-14607.
